# Supplementary material
Source: MDPI journal article supplement (https://www.mdpi.com/2313-576X/8/3/61)
Supplement: s1 [file s1]

## MSDs Severity and Frequency Questionnaire (MSFQ)

Using the body diagram on the left below, please circle any areas of pain, aching or discomfort that have been caused by working or occurred during work in the past month. Then, please mark the boxes [ ] with the ✓ symbol to signify MSD severity (question 1. **MSDs severity**), and MSDs frequency (question 2. **MSDs frequency**) in the affected body regions, and in question 3. and 4.

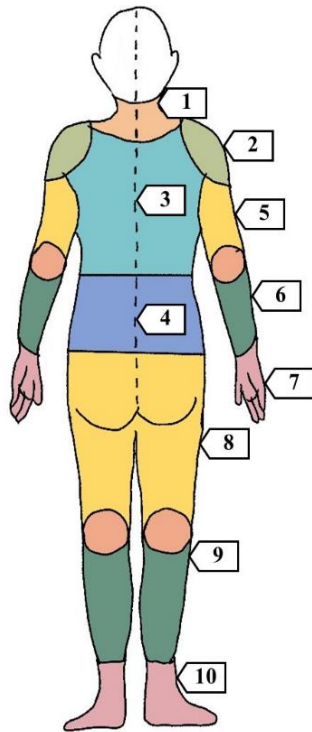

### Parts of the body which have been affected by pain, aching or discomfort

|                           |
|---------------------------|
| 1. Neck                   |
| 2. Shoulders              |
| 3. Upper back             |
| 4. Lower back             |
| 5. Upper arms             |
| 6. Lower arms             |
| 7. Wrists/ Palms/ Fingers |
| 8. Hips/ Thighs           |
| 9. Knees/ Calves          |
| 10. Ankles/ Feet          |

### 1. MSDs severity

If you experienced pain, aching, or discomfort, how severe was this? (Refer to the most painful times in the past month)

| mild | moderate | severe | very severe |
|------|----------|--------|-------------|
|      |          |        |             |
|      |          |        |             |
|      |          |        |             |
|      |          |        |             |
|      |          |        |             |
|      |          |        |             |
|      |          |        |             |
|      |          |        |             |
|      |          |        |             |
|      |          |        |             |

### 2. MSDs frequency

How frequently did you experience pain, aching, or discomfort? (Refer to the most frequent experience of pain, aches or discomfort in one week)

| 1-2 times/week | 3-4 times/week | once daily or every day | several times every day/ persisting for ≥24 hours |
|----------------|----------------|-------------------------|---------------------------------------------------|
|                |                |                         |                                                   |
|                |                |                         |                                                   |
|                |                |                         |                                                   |
|                |                |                         |                                                   |
|                |                |                         |                                                   |
|                |                |                         |                                                   |
|                |                |                         |                                                   |
|                |                |                         |                                                   |
|                |                |                         |                                                   |
|                |                |                         |                                                   |

**Annotation:** **mild** = annoying, interfering little with working, **moderate** = pain of short duration interfering significantly with posture adaptation, **severe** = persistent pain affecting ability to work, **very severe** = persistent pain (≥24 hours) causing inability to perform work and affecting quality of life

### 3. During the last 7 days of work, did you experience pain, aching, or discomfort?

[ ] No [ ] Yes, in the body region(s) of the .....

### 4. Regarding questions No. 1 and 2, was your pain, aching or discomfort only from work in the past month? [ ] Yes [ ] Not sure [ ] No If “No”, did you have any pain, aching or discomfort from the following. [ ] Sports [ ] Hobbies [ ] Housework [ ] Other.....

Reference: Chaiklieng, S. Health risk assessment on musculoskeletal disorders among potato-chip processing workers. PLoS One 2019, 14, e0224980. <https://doi.org/10.1371/journal.pone.0224980>.

**Figure S1.** The MSDs Severity and Frequency Questionnaire (MSFQ)
